# Supplementary material for: Construction of a novel gene-based model for prognosis prediction of clear cell renal cell carcinoma
Source: Springer Nature journal article supplement (doi:10.1186/s12935-020-1113-6), 2020-01-28

**A**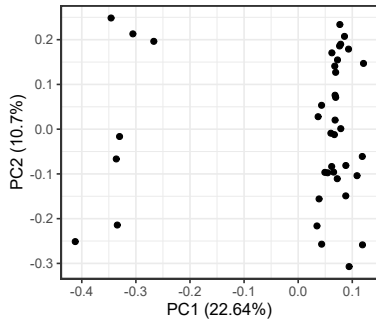**B**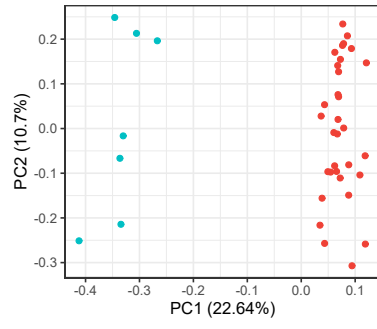**C**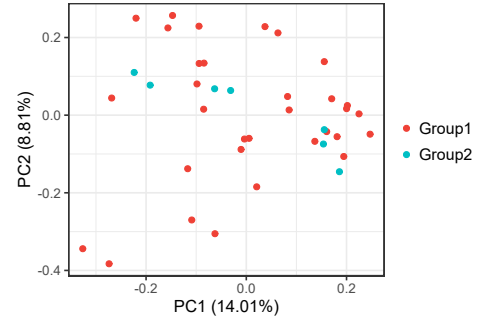

Supplement: MOESM8 [file 17603040]
