# Supplementary material for: Construction of a novel gene-based model for prognosis prediction of clear cell renal cell carcinoma
Source: Springer Nature journal article supplement (doi:10.1186/s12935-020-1113-6), 2020-01-28
Supplement: MOESM10 [file 17603040]

A

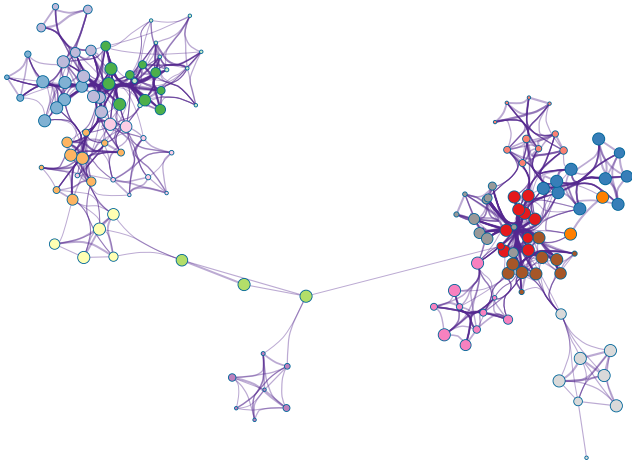

- monovalent inorganic cation transmembrane transpo
- inorganic ion homeostasis
- metanephros development
- excretion
- apical part of cell
- basolateral plasma membrane
- substrate-specific channel activity
- anion transport
- inorganic cation import across plasma membrane
- anchored component of membrane
- glycosaminoglycan binding
- sensory organ development
- regulation of pH
- reproductive structure development
- cellular response to growth factor stimulus
- regulation of body fluid levels
- pattern specification process
- presynapse
- digestive system process
- collecting duct development

B

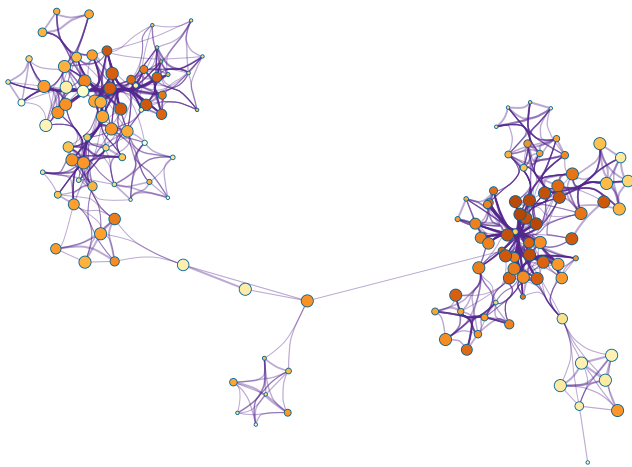

- $10^{-2}$
- $10^{-3}$
- $10^{-4}$
- $10^{-6}$
- $10^{-10}$
- $10^{-20}$
